# Supplementary material for: Deletion of Mir223 Exacerbates Lupus Nephritis by Targeting S1pr1 in Faslpr/lpr Mice
Source: PubMed Central journal article supplement (PMC7871001; doi:10.3389/fimmu.2020.616141), 2021-01-26

## Supplementary Materials and Methods

### **Generation of B6-Mir223<sup>-/-</sup>Fas<sup>lpr/lpr</sup> and MRL-Mir223<sup>-/-</sup>Fas<sup>lpr/lpr</sup> mice**

Using standard breeding techniques, we generated B6-Mir223<sup>-/-</sup>Fas<sup>lpr/lpr</sup> mice by crossing B6-Fas<sup>lpr/lpr</sup>Ptprc<sup>b/b</sup> males with B6-Mir223<sup>-/-</sup>Ptprc<sup>a/a</sup> females, then backcrossing B6-Mir223<sup>+/-</sup>Fas<sup>lpr/wt</sup>Ptprc<sup>a/b</sup> F1 females to B6-Fas<sup>lpr/lpr</sup>Ptprc<sup>b/b</sup> males. Mir223<sup>-/y</sup>Fas<sup>lpr/lpr</sup>Ptprc<sup>b/b</sup> F2 males and Mir223<sup>+/-</sup>Fas<sup>lpr/lpr</sup>Ptprc<sup>b/b</sup> F2 females were intercrossed to obtain the Mir223<sup>-/-</sup>Fas<sup>lpr/lpr</sup>Ptprc<sup>b/b</sup> (B6-Mir223<sup>-/-</sup>Fas<sup>lpr/lpr</sup>) females (n=15). Mir223<sup>+/y</sup>Fas<sup>lpr/lpr</sup>Ptprc<sup>b/b</sup> F2 males and Mir223<sup>+/-</sup>Fas<sup>lpr/lpr</sup>Ptprc<sup>b/b</sup> F2 females were also intercrossed to obtain B6-Mir223<sup>+/+</sup>Fas<sup>lpr/lpr</sup>Ptprc<sup>b/b</sup> (B6-Mir223<sup>+/+</sup>Fas<sup>lpr/lpr</sup>) female mice (n=15). Mice genotypes of lpr, Ptprc and Mir223 mutation were identified by PCR with DNA obtained by tail biopsy. These mice were further monitored until the age of 44 weeks. Sera were collected at 12 and 44 weeks of age, while weight and proteinuria were assessed from 12 weeks of age and every 4 weeks thereafter. Tissue samples, including spleen, lymph nodes, and kidneys, were obtained at the end of the study.

Similarly, we generated MRL-Mir223<sup>-/-</sup>Fas<sup>lpr/lpr</sup> mice by crossing MRL-Fas<sup>lpr/lpr</sup>Ptprc<sup>b/b</sup> males with B6-Mir223<sup>-/-</sup>Ptprc<sup>a/a</sup> females to yield MRL-Mir223<sup>+/-</sup>Fas<sup>lpr/wt</sup>Ptprc<sup>a/b</sup> F1 females. They were further backcrossed with MRL-Fas<sup>lpr/lpr</sup>Ptprc<sup>b/b</sup> males for 8 generations. Finally, MRL-Mir223<sup>-/y</sup>Fas<sup>lpr/lpr</sup>Ptprc<sup>b/b</sup> F9 males and MRL-Mir223<sup>+/-</sup>Fas<sup>lpr/lpr</sup>Ptprc<sup>b/b</sup> F9 females were intercrossed to obtain MRL-Mir223<sup>-/-</sup>Fas<sup>lpr/lpr</sup>Ptprc<sup>b/b</sup> (MRL-Mir223<sup>-/-</sup>Fas<sup>lpr/lpr</sup>) females (n=10). Mir223<sup>+/y</sup>Fas<sup>lpr/lpr</sup>Ptprc<sup>b/b</sup> F9 males and Mir223<sup>+/-</sup>Fas<sup>lpr/lpr</sup>Ptprc<sup>b/b</sup> F9 females were also intercrossed to obtain the Mir223<sup>+/+</sup>Fas<sup>lpr/lpr</sup>Ptprc<sup>b/b</sup> (MRL-Mir223<sup>+/+</sup>Fas<sup>lpr/lpr</sup>) females (n=10). These mice were further monitored until the age of 16 weeks. Sera were collected at 8 and 16 weeks of age,

while weight and proteinuria were assessed from 8 weeks of age and every 4 weeks thereafter. Tissue samples were obtained at the end of the observation.

Serum levels of total IgG (Abcam), isotype-specific IgGs (Southern Biotech), anti-double-stranded DNA (anti-dsDNA) (Shibayagi) and anti-S1P (Echelon Biosciences Inc.) were measured using commercially available ELISA kits in accordance with the manufacturers' instructions. The absorbance was determined using a microplate reader set at 450 nm. Urinary albumin excretions were measured every 4 weeks using LBIS Mouse Urinary Albumin Assay Kit (S-type) (SHIMA Laboratories) and standardized by urine creatinine concentration.

#### ***Isolation of mouse primary T cells and B cells***

Mouse CD4<sup>+</sup> and CD8<sup>+</sup> T cells and B cells in spleen or lymph nodes were isolated using a CD4 isolation kit II (Miltenyi Biotec), CD8a isolation kit II (Miltenyi Biotec) and PanBcell isolation kit II (Miltenyi Biotec) by negative selection, respectively. A purity rate of >96.6% for isolated CD4<sup>+</sup> and CD8<sup>+</sup> T cells and B cells was confirmed by flow cytometry.

#### ***EL4 cell line culture and transfection of miRNAs***

The EL4 mouse T cell line was obtained from the American Type Culture Collection and cultured in DMEM (Life Technologies) supplemented with 10% FBS (Life Technologies), 100 U/ml penicillin, and 100 µg/ml streptomycin at 37°C in a 5% CO<sub>2</sub> incubator. The transfection of miRNA mimics (mirVana; Invitrogen) was performed with Lipofectamine RNAiMAX (Invitrogen) by the reverse transfection procedure. EL4 cells were transfected with miR-223-3p mimic or its negative control at a final concentration of 10 nM. They

were harvested after 24 hours for RNA extraction or after 48 hours for Western blot analysis. To detect apoptotic cells, EL4 cells were stained with FITC-conjugated Annexin V and 7-aminoactinomycin D staining (7-AAD) using the FITC Annexin V Apoptosis Detection Kit with 7-AAD (640922, BioLegend) following the manufacturer's recommendation. The stained cells were directly analyzed with FACS Aria I (BD Biosciences) and FlowJo software (TreeStar).

### ***Western blot analysis***

The lysates of murine splenic CD4<sup>+</sup> T cells and EL4 cells which were transfected with miR-223-3p mimic or its negative control were prepared by homogenization with CellLytic M (Sigma-Aldrich), supplemented with a protease inhibitor cocktail (Sigma-Aldrich). Protein concentration was determined using the Pierce BCA protein Assay kit (Thermo Fisher Scientific). They were run on a Criterion<sup>TM</sup>TGX<sup>TM</sup>Precast Gel (Bio-Rad) electrophoresis (SDS-PAGE) and blotted on Amersham Hybond P 0.45  $\mu$ m PVDF (GE Healthcare Life Sciences). The primary antibodies against S1PR1 at 1:500 dilution (ab137467, Abcam), GAPDH at 1:1,000 (5174T, Cell Signaling), Bcl-xL at 1:1000 (2762S, Cell Signaling), Bcl2 at 1:1000 (3498S, Cell Signaling), Caspase-3 at 1:1000 (14220S, Cell signaling) and  $\beta$ -actin at 1:4000 (A2066; Sigma-Aldrich) were incubated overnight at 4°C in TBS supplemented with 0.1% Tween 20 (TBS-T) containing 5% bovine serum albumin. Then, the blots were washed with TBS-T and incubated with Goat anti-rabbit IgG-HRP at 1:20,000 dilution (7074S, Cell Signaling) for 60 minutes at room temperature. After three-time washes with TBS-T, they were developed using the SuperSignal<sup>TM</sup> West Femto Maximum Sensitivity Substrate (Thermo Fisher Scientific)

and visualized using an ImageQuant LAS 4000 Mini kit (GE Healthcare Life Sciences). Protein bands were semiquantified by densitometry using Image J.

### ***Isolation of ubiquitinated proteins and Western blot***

Isolation of ubiquitin-conjugated proteins was performed using the UbiQapture-Q Kit (Enzo Life Science), as described by the manufacturer. A total of 25 µg of lysates from cells was used per assay. Samples were added to the tubes containing 20 µl UbiQapture-Q matrix and incubated overnight at 4°C in a horizontal rotor mixer. The matrix was then carefully washed and unbound fraction samples were kept for analysis. Finally, the ubiquitin-protein conjugates were eluted by addition of 100 µl sample buffer and heating at 95°C for 10 min. The elution fraction was clarified from the matrix. The starting material, unbound and elution fraction samples were analyzed by immunoblotting with the anti S1PR1 antibody and anti-monoubiquitinated and anti-polyubiquitinated conjugate antibodies (FK2) (Enzo Life Science).

### ***Flow cytometry analysis***

The spleen and cervical lymph nodes from MRL/lpr mice were finely minced and incubated in a fresh digestion medium containing 3 ml DMEM with 2 mg/ml collagenase D (Roche) at 37°C for 30 minutes, with gentle shaking at 200 rpm on an orbital shaker. Single-cell suspensions were prepared from the spleens and lymph nodes of MRL-*Mir223*<sup>-/-</sup>*Fas*<sup>lpr/lpr</sup>, MRL-*Mir223*<sup>+/+</sup>*Fas*<sup>lpr/lpr</sup>, B6-*Mir223*<sup>-/-</sup>*Fas*<sup>lpr/lpr</sup> and B6-*Mir223*<sup>+/+</sup>*Fas*<sup>lpr/lpr</sup> mice. Red blood cells were removed using a red cell lysing buffer (BD Pharm Lyse). The cells were first incubated at 4°C for 10 minutes with an Fc receptor (FcR) blocking reagent (Miltenyi Biotec) to reduce nonspecific binding of antibodies to

FcRs. The  $1 \times 10^6$  cells derived from the spleen and lymph nodes were incubated at 4°C for 30 minutes in staining buffer (BioLegend) with the relevant optimized amount of fluorochrome conjugated antibodies or the appropriate isotype controls: FITC-conjugated anti CD4 (GK1.5), VioBlue-conjugated anti-CD4 (GK1.5), allophycocyanin (APC)-conjugated anti-CD8 (53-6.7), APC-conjugated anti-CD62L (MEL14-H2.100), phycoerythrin (PE)-conjugated anti-CD44 (IM7.8.1), APC-conjugated anti-CD69 (H1.2F3), APC-conjugated anti-CD19 (6D5), PE-conjugated anti-CD138 (clone REA104). All antibodies were purchased from Miltenyi Biotec except BV421-conjugated anti-CD3e (SK7) (BD Biosciences) and APC-conjugated anti-S1pr1 (713412) (R&D Systems). Dead cells were excluded from the analysis using 7-AAD staining (BD PharMingen). All data were acquired with a FACSAria I flow cytometer (BD Biosciences) and analyzed using FlowJo software (TreeStar).

**Supplementary Table1.** miRNAs upregulated in CD4<sup>+</sup> T cells derived from MRL/lpr mice compared with B6 mice.

1. RPM : Reads per million mapped reads.

2. Fold change = MRL/lpr RPM/B6 RPM

The candidate miRNAs are sorted by fold change.

| miRNAs          | Total Reads | B6 Reads | MRL/lpr Reads | B6 RPM <sup>1</sup> | MRL/lpr RPM <sup>1</sup> | Fold change <sup>2</sup> |
|-----------------|-------------|----------|---------------|---------------------|--------------------------|--------------------------|
| mmu-miR-144-3p  | 1143        | 13       | 1130          | 0.39                | 37.70                    | 97.5                     |
| mmu-miR-451a    | 383         | 11       | 372           | 0.33                | 12.41                    | 37.9                     |
| mmu-miR-582-3p  | 104         | 4        | 100           | 0.12                | 3.34                     | 28.0                     |
| mmu-miR-223-3p  | 6706        | 267      | 6439          | 7.94                | 214.84                   | 27.0                     |
| mmu-miR-143-3p  | 4138        | 179      | 3959          | 5.32                | 132.09                   | 24.8                     |
| mmu-miR-127-3p  | 16908       | 817      | 16091         | 24.29               | 536.89                   | 22.1                     |
| mmu-miR-144-5p  | 1772        | 88       | 1684          | 2.62                | 56.19                    | 21.4                     |
| mmu-miR-152-3p  | 286         | 15       | 271           | 0.45                | 9.04                     | 20.2                     |
| mmu-miR-434-5p  | 136         | 8        | 128           | 0.24                | 4.27                     | 17.9                     |
| mmu-miR-411-5p  | 2527        | 165      | 2362          | 4.91                | 78.81                    | 16.0                     |
| mmu-miR-410-3p  | 1175        | 77       | 1098          | 2.29                | 36.64                    | 16.0                     |
| mmu-miR-21a-3p  | 2481        | 165      | 2316          | 4.91                | 77.27                    | 15.7                     |
| mmu-miR-300-3p  | 207         | 14       | 193           | 0.42                | 6.44                     | 15.4                     |
| mmu-miR-381-3p  | 915         | 73       | 842           | 2.17                | 28.09                    | 12.9                     |
| mmu-miR-541-5p  | 1157        | 97       | 1060          | 2.88                | 35.37                    | 12.2                     |
| mmu-miR-3107-5p | 151687      | 12909    | 138778        | 383.80              | 4630.41                  | 12.0                     |
| mmu-miR-486-5p  | 151687      | 12909    | 138778        | 383.80              | 4630.41                  | 12.0                     |
| mmu-miR-183-5p  | 6390        | 571      | 5819          | 16.98               | 194.15                   | 11.4                     |
| mmu-miR-379-5p  | 121         | 11       | 110           | 0.33                | 3.67                     | 11.2                     |

**Supplementary Table 2.** mRNA profiling in splenic CD4+ T cells purified in MRL/lpr lupus-prone mice and B6 mice. Predicted target genes of differentially expressed miR-223-3p in miRDB.

1. FPKM : Reads per kilobase of exon model per million mapped reads.

2. Fold change =  $FPKM_{MRL/lpr} / FPKM_{B6}$

| Gene            | FPKM B6   | FPKM MRL   | Fold change | p_value     |
|-----------------|-----------|------------|-------------|-------------|
| <i>Trim30d</i>  | 5.45455   | 0.225717   | 0.041381507 | 0.00037222  |
| <i>Dusp10</i>   | 184.754   | 22.679     | 0.122752133 | 0.000072097 |
| <i>Atp1b1</i>   | 25.9197   | 5.39045    | 0.207967501 | 0.0260443   |
| <i>Kctd4</i>    | 0.0513919 | 0.0109806  | 0.213663148 | 0.904441    |
| <i>Scn3a</i>    | 0.0154045 | 0.00329138 | 0.213663148 | 0.263443    |
| <i>Slpr1</i>    | 138.017   | 33.0183    | 0.239233279 | 0.00477601  |
| <i>Ttc28</i>    | 6.13654   | 1.57781    | 0.257117551 | 0.0280216   |
| <i>Smoc1</i>    | 0.310147  | 0.0852     | 0.274707842 | 0.211336    |
| <i>Apold1</i>   | 0.0656456 | 0.0200373  | 0.305234512 | 0.335325    |
| <i>Foxp1</i>    | 42.1957   | 14.1079    | 0.334342811 | 0.0922709   |
| <i>Cd8a</i>     | 1.18792   | 0.414419   | 0.348859977 | 0.40143     |
| <i>Slc4a4</i>   | 0.0360867 | 0.0128504  | 0.356098929 | 0.424302    |
| <i>Kmt2c</i>    | 22.5525   | 8.07121    | 0.3578855   | 0.0400435   |
| <i>Mfhas1</i>   | 10.5987   | 3.99277    | 0.376724039 | 0.0978997   |
| <i>Tgfbr3</i>   | 11.4107   | 4.68328    | 0.410430543 | 0.121272    |
| <i>Rbm20</i>    | 0.103833  | 0.0434059  | 0.418036263 | 0.398298    |
| <i>Acpp</i>     | 7.70997   | 3.23427    | 0.419493395 | 0.306921    |
| <i>Slc25a53</i> | 3.38412   | 1.47201    | 0.434976691 | 0.532931    |
| <i>Tbc1d16</i>  | 0.901121  | 0.408687   | 0.453530035 | 0.379875    |
| <i>Il6st</i>    | 30.1119   | 14.1055    | 0.468437994 | 0.1333      |
| <i>Siah1a</i>   | 12.0616   | 5.90726    | 0.489757673 | 0.328482    |
| <i>Ranbp3l</i>  | 0.105077  | 0.0518103  | 0.493068502 | 0.513081    |
| <i>Adcyl</i>    | 0.0358616 | 0.0178788  | 0.498549963 | 0.513053    |

**Supplementary Table 3.** Human and mouse miR-223 binding site of *SIPRI*

---

|                          |                                                     |
|--------------------------|-----------------------------------------------------|
| Mus <i>Sipr1</i> 3'-UTR  | 5' -ACUCCCCAA AAGCAUUACU UUAACUGACA GGAACAUCA-3'    |
| Mus miR-223              | 3' -AC CCCAUAAACU GUUUGACUGU-5'                     |
| Homo <i>SIPRI</i> 3'-UTR | 5' -UAUCAACUUU UAAACAUAUAA UAAACUGAUU UUUUAAAAGA-3' |
| Homo miR-223             | 3' -AC CCCAUAAACU GUUUGACUGU-5'                     |

---

Red shows the seed sequence of miR-223.



**Supplementary Table 4.** Demographics of the patients with systemic erythematosus (SLE).

| Parameters                                                          | SLE (n=15)<br>Mean±standard deviation |
|---------------------------------------------------------------------|---------------------------------------|
| Sex (male / female)                                                 | 5/10                                  |
| Race                                                                | Japanese                              |
| Age (years)                                                         | 46±15.1                               |
| SLEDAI (systemic erythematosus disease activity index)              | 17.1±8.5                              |
| BILAG (British Isles Lupus Assessment Group disease activity index) | 14.5±4.9                              |
| Anti-nuclear antibody (ANA) positive (%)                            | 93.3                                  |
| ANA titer (x)                                                       | 828.6±638.3                           |
| dsDNA antibody positive (%)                                         | 86.7                                  |
| Anti-dsDNA antibody (IU/mL)                                         | 134.4±144.0                           |
| Anti-Sm positive (%)                                                | 26.7                                  |
| Anti-Sm antibody (U/ml)                                             | 20.4±42.4                             |
| Anti-ribonucleoprotein (RNP) positive (%)                           | 40.0                                  |
| Anti-RNP antibody (U/mL)                                            | 81.6±108.9                            |
| Anti-cardiolipin (CL) antibody (%)                                  | 33.3                                  |
| Anti-CL antibody (U/mL)                                             | 18.4±28.4                             |
| Aniti-β2 glycoprotein I (β2GPI) positive (%)                        | 6.7                                   |
| Aniti-β2GPI antibody (U/mL)                                         | 3.8±9.9                               |
| Lupus anticoagulant positive (%)                                    | 40.0                                  |
| Rheumatoid factor (RF) (IU/mL)                                      | 11.2±11.6                             |
| Anti-SS-A positive (%)                                              | 80.0                                  |
| Anti-SS-A antibody (U/mL)                                           | 159.7±105.2                           |
| Anti-SS-B positive rate (%)                                         | 13.3                                  |
| Anti-SS-B antibody (U/mL)                                           | 16.0±44.2                             |
| IgG (mg/dL)                                                         | 2255.6±504.3                          |
| IgA (mg/dL)                                                         | 338.1±145.9                           |
| IgM (mg/dL)                                                         | 161.7±131.0                           |
| C3 below normal range (%)                                           | 80.0                                  |
| C3 titer (mg/dL)                                                    | 44.6±20.6                             |
| C4 below normal range (%)                                           | 93.3                                  |
| C4 titer (mg/dL)                                                    | 7.0±4.2                               |
| CH50 below normal range (%)                                         | 93.3                                  |
| CH50 (U/mL)                                                         | 17.2±10.7                             |
| Serum creatinine (mg/dL)                                            | 0.7±0.2                               |
| Urine protein / creatinine (g/gCr)                                  | 2.1±3.9                               |
| White blood cells ( $\times 10^3/\mu\text{L}$ )                     | 3304.0±1531.6                         |
| Lymphocytes ( $\times 10^3/\mu\text{L}$ )                           | 861.3±1037.0                          |
| Hemoglobin (g/dL)                                                   | 11.3±1.8                              |
| Platelets ( $\times 10^7/\mu\text{L}$ )                             | 16.0±7.1                              |
| Lupus nephritis (%)                                                 | 40.0                                  |
| Arthritis (%)                                                       | 66.7                                  |
| Skin rash (%)                                                       | 73.3                                  |
| Neuropsychiatric SLE (%)                                            | 20.0                                  |

**Supplementary Table 5.** The list of the primers used for RT-PCR. Genes analyzed by Taqman Gene Expression Assays and Taqman MicroRNA Assays.

| <b>Gene Name</b>  | <b>Probe Number</b> |
|-------------------|---------------------|
| <i>S1pr1</i>      | Mm02619656_s1       |
| <i>Cxcl9</i>      | Mm00434946_m1       |
| <i>Cxcl10</i>     | Mm00445235_m1       |
| <i>Cxcl11</i>     | Mm00444662_m1       |
| <i>Ccl2</i>       | Mm00441242_m1       |
| <i>Ccl4</i>       | Mm00443111_m1       |
| <i>Ccl5</i>       | Mm01302427_m1       |
| <i>Gapdh</i>      | Mm99999915_g1       |
| <i>SIPRI</i>      | Hs01922614_s1       |
| <i>GAPDH</i>      | Hs02786624_g1       |
| <i>miR-223-3p</i> | 002295              |
| <i>snoRNA202</i>  | 001232              |
| <i>snoRNA234</i>  | 001234              |
| <i>RNU48</i>      | 001006              |

**Supplementary Figure 1.** The protein expression of *S1pr1* gene in CD4<sup>+</sup> T cells isolated from C57BL/6 (B6) and MRL/lpr lupus-prone (MRL/lpr) mice. **(A)** Western blot analyses of S1PR1 in CD4<sup>+</sup> T cells in B6 and MRL/lpr mice. Band intensity (normalized to total  $\beta$ -actin) measured by using ImageJ software. **(B)** CD4<sup>+</sup> T cells in B6 and MRL/lpr mice were lysed in CellLytic M and subjected to UbiQapture-Q matrix. The matrix beads were washed, and supernatants were kept as unbound fraction (UF). The polyubiquitinated proteins were eluted. Starting material (SM), UF, and elution fraction (EF) were blotted with rabbit mouse anti-monoubiquitinated and anti-polyubiquitinated conjugate antibodies (FK2) and anti S1PR1 antibody.

**Supplementary Figure 2.** *Mir223* knockout lupus-prone B6.MRL-*Fas*<sup>lpr</sup> mice (B6-*Mir223*<sup>-/-</sup>*Fas*<sup>lpr/lpr</sup>) showed no significant change in survival rate, organ weights and skin scores. **(A)** Body weight **(B)** survival rates **(C)** skin score **(D)**. organ weights at 44 weeks in B6-*Mir223*<sup>-/-</sup>*Fas*<sup>lpr/lpr</sup> (n=16) and B6-*Mir223*<sup>+/+</sup>*Fas*<sup>lpr/lpr</sup> (n=17) mice. **(E)** Splenocytes cell counts and lymph nodes cell counts at 44 weeks in B6-*Mir223*<sup>-/-</sup>*Fas*<sup>lpr/lpr</sup> (n=7) and B6-*Mir223*<sup>+/+</sup>*Fas*<sup>lpr/lpr</sup> (n=8) mice. **(F)** Peripheral blood counts of B6-*Mir223*<sup>-/-</sup>*Fas*<sup>lpr/lpr</sup> (n=10) and B6-*Mir223*<sup>+/+</sup>*Fas*<sup>lpr/lpr</sup> (n=9) mice. **(G)** Serum levels of total IgG, anti-double-stranded DNA antibodies (anti-dsDNA Ab), S1P concentration and each immunoglobulin subclass at 12 and 44 weeks in B6-*Mir223*<sup>-/-</sup>*Fas*<sup>lpr/lpr</sup> (n=7) and B6-*Mir223*<sup>+/+</sup>*Fas*<sup>lpr/lpr</sup> (n=8) mice were measured by enzyme-linked immunosorbent assay. Data are presented as mean  $\pm$  SEM. \**p* < 0.05, \*\*\**p* < 0.001, ns = not significant, by Student's t-test in **(C)**, **(D)**, **(E)**, **(F)** and **(G)**, by Wilcoxon signed-rank test in **(A)**, and by log-rank test in **(B)**.

**Supplementary Figure 3.** *Mir223* knockout lupus-prone MRL/MpJ-*Fas*<sup>lpr</sup>/J mice (MRL-*Mir223*<sup>-/-</sup>*Fas*<sup>lpr/lpr</sup>) showed no significant change in survival rate, organ weights and skin scores. (A) Body weight (B) survival rates (C) skin score (D) organ weights at 16 weeks in MRL-*Mir223*<sup>-/-</sup>*Fas*<sup>lpr/lpr</sup> (n=11) and MRL-*Mir223*<sup>+/+</sup>*Fas*<sup>lpr/lpr</sup> (n=11) mice. (E) Splenocytes cell counts and lymph nodes cell counts at 16 weeks in MRL-*Mir223*<sup>-/-</sup>*Fas*<sup>lpr/lpr</sup> (n=4) and MRL-*Mir223*<sup>+/+</sup>*Fas*<sup>lpr/lpr</sup> (n=4) mice. (F) Serum levels of total IgG, anti-double-stranded DNA antibodies (anti-dsDNA Ab), S1P concentration and each immunoglobulin subclass at 8 and 16 weeks in MRL-*Mir223*<sup>-/-</sup>*Fas*<sup>lpr/lpr</sup> (n=10) and MRL-*Mir223*<sup>+/+</sup>*Fas*<sup>lpr/lpr</sup> (n=7) mice were measured by enzyme-linked immunosorbent assay. Data are presented as mean ± SEM. \*\**p* < 0.01, ns = not significant, by Student's t-test in (C), (D), (E) and (F), by Wilcoxon signed-rank test in (A), and by log-rank test in (B).

**Supplementary Figure 4.** The apoptosis related proteins expression in B6-*Mir223*<sup>-/-</sup>*Fas*<sup>lpr/lpr</sup> mice. Western blot analyses of Bcl-xL, Bcl-2 and Caspase-3 in axillary lymph nodes and spleen B6-*Mir223*<sup>-/-</sup>*Fas*<sup>lpr/lpr</sup> (n=3) and B6-*Mir223*<sup>+/+</sup>*Fas*<sup>lpr/lpr</sup> (n=3) mice. Band intensity (normalized to total β-actin) measured by using ImageJ software. Quantification of Western blot results (below). (n=3 per group). Data are presented as mean ± SEM. ns = not significant, by Wilcoxon signed-rank test.

**Supplementary Figure 5.** Lymphocyte subsets in splenocytes and cervical lymph nodes cells in MRL-*Mir223*<sup>-/-</sup>*Fas*<sup>lpr/lpr</sup> and MRL-*Mir223*<sup>+/+</sup>*Fas*<sup>lpr/lpr</sup> mice. (A) Various cellular subsets in lymph nodes and spleen. CD3<sup>+</sup>CD4<sup>+</sup> (CD4 T cells), CD3<sup>+</sup>CD8<sup>+</sup> (CD8 T cells),

CD3<sup>+</sup>CD4<sup>-</sup>CD8<sup>-</sup> (Double negative (DN) T cells), CD19<sup>+</sup> (B cells), CD19<sup>-</sup>CD138<sup>+</sup> (Plasma cells), CD4<sup>+</sup>CD44<sup>+</sup>CD62L<sup>+</sup> (Memory T cells), CD4<sup>+</sup>CD44<sup>+</sup>CD62L<sup>-</sup> (Effector T cells), CD69<sup>+</sup>CD4<sup>+</sup> cells, S1PR1<sup>+</sup>CD3<sup>+</sup> cells, S1PR1<sup>+</sup>CD4<sup>+</sup> cells. Distribution of cellular subsets in total cells isolated from whole cervical lymph nodes and spleen were indicated in MRL-*Mir223*<sup>-/-</sup>*Fas*<sup>lpr/lpr</sup> (n=4) and MRL-*Mir223*<sup>+/+</sup>*Fas*<sup>lpr/lpr</sup> (n=4) mice. Absolute number of total splenocyte and lymph nodes cell had no difference between two genotypes (**Supplementary Figure 3E**). **(B)** Apoptotic cellular subsets in lymph nodes and spleen. Annexin V<sup>+</sup>7-AAD<sup>-</sup> (Early apoptosis cells), Annexin V<sup>+</sup>7-AAD<sup>+</sup> (Late apoptosis cells). Distribution of cellular subsets in each CD3<sup>+</sup>CD4<sup>+</sup> T cells or CD3<sup>+</sup>CD8<sup>+</sup> T cells isolated from whole cervical lymph nodes and spleen were indicated in MRL-*Mir223*<sup>-/-</sup>*Fas*<sup>lpr/lpr</sup> (n=4) and MRL-*Mir223*<sup>+/+</sup>*Fas*<sup>lpr/lpr</sup> (n=4) mice. **(C)** Western blot analyses of Bcl-xL, Bcl-2 and Caspase-3 in axillary lymph nodes and spleen MRL-*Mir223*<sup>-/-</sup>*Fas*<sup>lpr/lpr</sup> (n=3) and MRL-*Mir223*<sup>+/+</sup>*Fas*<sup>lpr/lpr</sup> (n=3) mice. Band intensity (normalized to total  $\beta$ -actin) measured by using ImageJ software. Quantification of Western blot results (right side) (n=3 per group). Data are presented as mean  $\pm$  SEM. \**p* < 0.05, ns = not significant, by Student's t-test in **(A)** and **(B)**, by Wilcoxon signed-rank test in **(C)**.

**Supplementary Figure 6.** The *Slpr1* and miR-223-3p expression in B6-*Mir223*<sup>-/-</sup>*Fas*<sup>lpr/lpr</sup> mice. **(A)** mRNA expression of *Slpr1* in CD4<sup>+</sup> T cells, CD8<sup>+</sup> T cells and B cells isolated from whole cervical lymph nodes and spleen in B6-*Mir223*<sup>-/-</sup>*Fas*<sup>lpr/lpr</sup> (n=3) and B6-*Mir223*<sup>+/+</sup>*Fas*<sup>lpr/lpr</sup> (n=3) mice. Data are presented as mean  $\pm$  SEM. \**p* < 0.05, ns = not significant, by Student's t-test. **(B)** The expression level of miR-223-3p in CD4<sup>+</sup> T

cells, CD8<sup>+</sup> T cells and B cells isolated from whole cervical lymph nodes and spleen in B6-*Mir223*<sup>-/-</sup>*Fas*<sup>lpr/lpr</sup> (n=3) and B6-*Mir223*<sup>+/+</sup>*Fas*<sup>lpr/lpr</sup> (n=3) mice. (C) Western blot analyses of S1PR1 in CD4<sup>+</sup> T cell from cervical lymph nodes and spleen of B6-*Mir223*<sup>-/-</sup>*Fas*<sup>lpr/lpr</sup> (n=3) and B6-*Mir223*<sup>+/+</sup>*Fas*<sup>lpr/lpr</sup> (n=3) mice. Band intensity (normalized to total  $\beta$  -actin) measured by using ImageJ software. Quantification of Western blot results (right side). (n=3 per group). Data are presented as mean  $\pm$  SEM. \**p* < 0.05, by Wilcoxon signed-rank test.

**Supplementary Figure 7.** Exacerbation of lupus nephritis in B6-*Mir223*<sup>-/-</sup>*Fas*<sup>lpr/lpr</sup> mice.

(A) Deposition of C3 and IgG as evaluated by direct immunofluorescence, in the kidneys from B6-*Mir223*<sup>-/-</sup>*Fas*<sup>lpr/lpr</sup> and B6-*Mir223*<sup>+/+</sup>*Fas*<sup>lpr/lpr</sup> mice. Images are representative of 5 mice per group. Bars=50  $\mu$ m. (B) Immunofluorescence intensity of C3 and IgG deposits, as evaluated using computed image analysis software. The final fluorescence intensity score reflects the average of at least 5 glomeruli per mouse. (C) Glomerular area, mesangial matrix area and numbers of glomerular nuclei in B6-*Mir223*<sup>-/-</sup>*Fas*<sup>lpr/lpr</sup> compared to B6-*Mir223*<sup>+/+</sup>*Fas*<sup>lpr/lpr</sup> mice (n=10 per group). Data are presented as mean  $\pm$  SEM. \**p* < 0.05, \*\**p* < 0.01, \*\*\**p* < 0.001, ns = not significant, by Wilcoxon signed-rank test in (B), by Student's t-test in scores in (C).

**Supplementary Figure 8.** Glomerulonephritis with infiltration of CD4<sup>+</sup>S1PR1<sup>+</sup> T cells

in in B6-*Mir223*<sup>-/-</sup>*Fas*<sup>lpr/lpr</sup> (A) Levels of proteinuria in B6-*Mir223*<sup>-/-</sup>*Fas*<sup>lpr/lpr</sup> (n=10) and B6-*Mir223*<sup>+/+</sup>*Fas*<sup>lpr/lpr</sup> (n=11) mice. (B) Organ weights at 44 weeks in B6-*Mir223*<sup>-/-</sup>*Fas*<sup>lpr/lpr</sup> (n=16) and B6-*Mir223*<sup>+/+</sup>*Fas*<sup>lpr/lpr</sup> (n=17) mice. (C) The image of CD4<sup>+</sup> cells,

CD4<sup>+</sup>S1PR1<sup>+</sup> cells, CD8<sup>+</sup> cells and CD8<sup>+</sup>S1PR1<sup>+</sup> cells in tubular lesion in B6-*Mir223*<sup>-/-</sup>*Fas*<sup>lpr/lpr</sup> compared to B6-*Mir223*<sup>+/+</sup>*Fas*<sup>lpr/lpr</sup> mice (n = 5 per group). (D) mRNA expression of *Cxcl9*, *Cxcl10*, *Cxcl11*, *Ccl2*, *Ccl4* and *Ccl5* in renal cortex from B6-*Mir223*<sup>-/-</sup>*Fas*<sup>lpr/lpr</sup> (n=5) and B6-*Mir223*<sup>+/+</sup>*Fas*<sup>lpr/lpr</sup> (n=5) mice. Images are representative of 5 mice per group. Bars=50 μm. Data are presented as mean ± SEM. \**p* < 0.05, \*\**p* < 0.01, \*\*\**p* < 0.001, ns = not significant, by Wilcoxon signed-rank test in (A) and (D), by Student's t-test in (B).

**Supplementary Figure 9.** Exacerbation of lupus nephritis in *Mir223*<sup>-/-</sup>*Fas*<sup>lpr/lpr</sup> mice. (A) Deposition of C3 and IgG as evaluated by direct immunofluorescence, in the kidneys from MRL-*Mir223*<sup>-/-</sup>*Fas*<sup>lpr/lpr</sup> and MRL-*Mir223*<sup>+/+</sup>*Fas*<sup>lpr/lpr</sup> mice. Images are representative of 5 mice per group. Bars=50 μm. Representative kidney sections from MRL-*Mir223*<sup>-/-</sup>*Fas*<sup>lpr/lpr</sup> and MRL-*Mir223*<sup>+/+</sup>*Fas*<sup>lpr/lpr</sup> mice, stained with periodic acid-Schiff (PAS) for analysis of glomerular size and mesangial expansion. Bars=50 μm. (B) Immunofluorescence intensity of C3 and IgG deposits, as evaluated using computed image analysis software. The final fluorescence intensity score reflects the average of at least 5 glomeruli per mouse. (C) Score distribution of glomerular, renal vascular and tubulointerstitial lesions in MRL-*Mir223*<sup>-/-</sup>*Fas*<sup>lpr/lpr</sup> compared to MRL-*Mir223*<sup>+/+</sup>*Fas*<sup>lpr/lpr</sup> mice (n=10 per group). Glomerular area, mesangial matrix area and numbers of glomerular nuclei in MRL-*Mir223*<sup>-/-</sup>*Fas*<sup>lpr/lpr</sup> compared to MRL-*Mir223*<sup>+/+</sup>*Fas*<sup>lpr/lpr</sup> mice (n=10 per group). Data are presented as mean ± SEM. \**p* < 0.05, \*\**p* < 0.01, \*\*\**p* < 0.001, ns = not significant, by Wilcoxon signed-rank test in (B), by Pearson's  $\chi^2$  test and by Student's t-test in scores in (C).

**Supplementary Figure 10.** Glomerulonephritis with infiltration of CD4<sup>+</sup> T cells in *Mir223*<sup>-/-</sup> *Fas*<sup>lpr/lpr</sup> mice. (A) Levels of proteinuria in MRL-*Mir223*<sup>-/-</sup> *Fas*<sup>lpr/lpr</sup> (n=10) and MRL-*Mir223*<sup>+/+</sup> *Fas*<sup>lpr/lpr</sup> (n=11) mice. (B) The number of CD4<sup>+</sup> cells, CD4<sup>+</sup>S1PR1<sup>+</sup> cells, CD8<sup>+</sup> cells and CD8<sup>+</sup>S1PR1<sup>+</sup> cells in glomerulus or tubular lesion in MRL-*Mir223*<sup>-/-</sup> *Fas*<sup>lpr/lpr</sup> compared to MRL-*Mir223*<sup>+/+</sup> *Fas*<sup>lpr/lpr</sup> mice (n = 5 per group). (C) The image of CD4<sup>+</sup> cells, CD4<sup>+</sup>S1PR1<sup>+</sup> cells, CD8<sup>+</sup> cells and CD8<sup>+</sup>S1PR1<sup>+</sup> cells in glomerular and tubular lesion in MRL-*Mir223*<sup>-/-</sup> *Fas*<sup>lpr/lpr</sup> compared to MRL-*Mir223*<sup>+/+</sup> *Fas*<sup>lpr/lpr</sup> mice (n = 5 per group). Images are representative of 5 mice per group. Bars=50 μm. Data are presented as mean ± SEM. \**p* < 0.05, \*\**p* < 0.01, \*\*\**p* < 0.001, ns = not significant, by Student's t-test in (A) and (B).

**Supplementary Figure 11.** mRNA expression of *Cxcl9*, *Cxcl10*, *Cxcl11*, *Ccl2*, *Ccl4* and *Ccl5* in renal cortex from MRL-*Mir223*<sup>-/-</sup> *Fas*<sup>lpr/lpr</sup> (n=5) and MRL-*Mir223*<sup>+/+</sup> *Fas*<sup>lpr/lpr</sup> (n=5) mice. Data are presented as mean ± SEM. ns = not significant, by Wilcoxon signed-rank test.



# Supplementary Figure 1

**A**

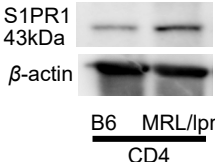

**B**

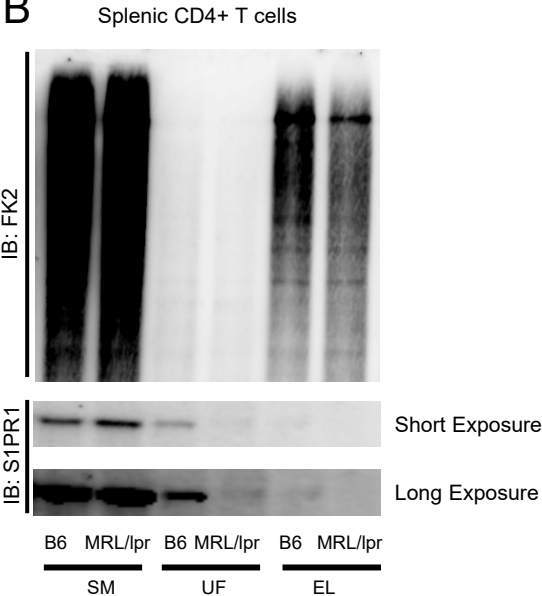

# Supplementary Figure 2

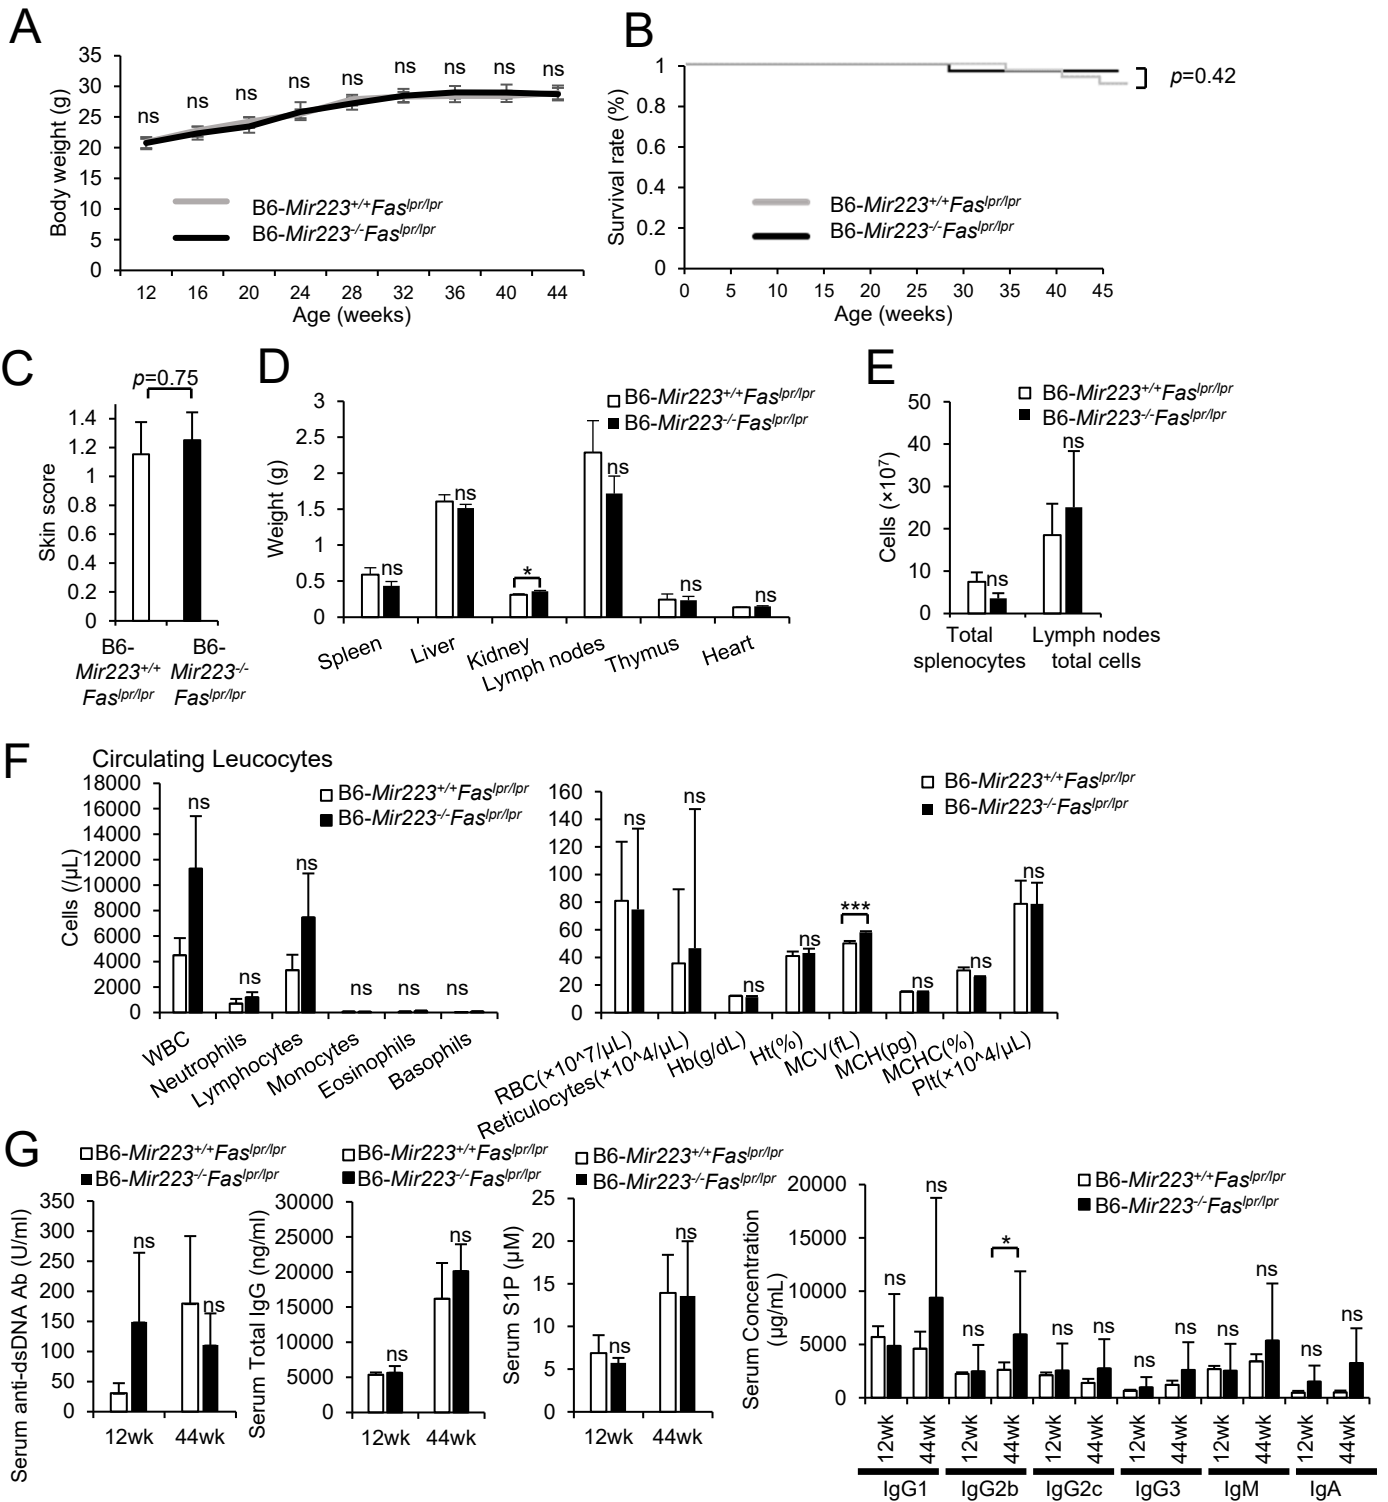

# Supplementary Figure 3

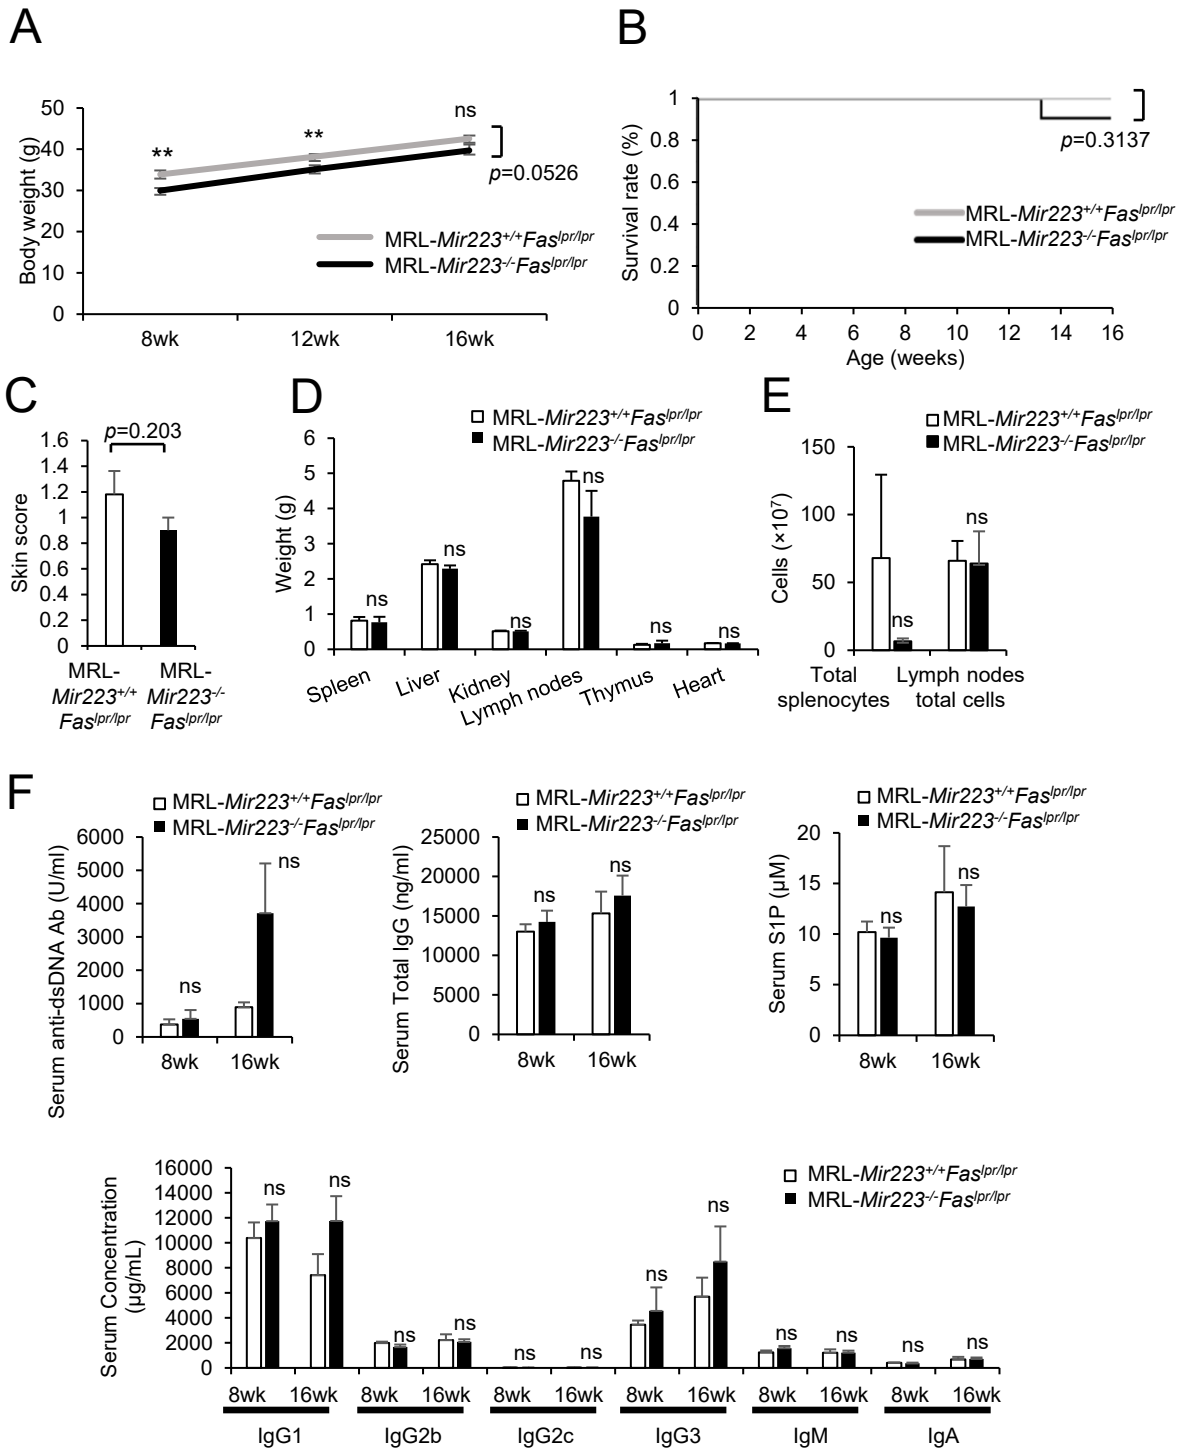

# Supplementary Figure 4

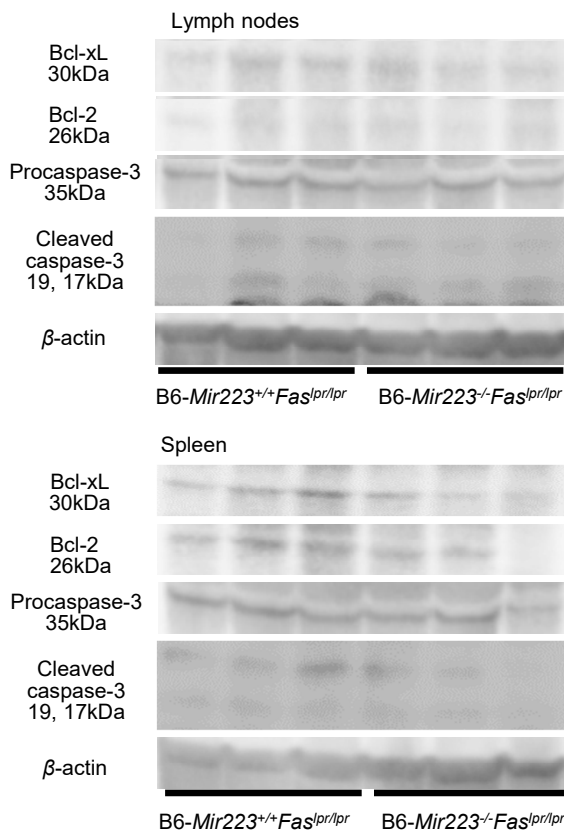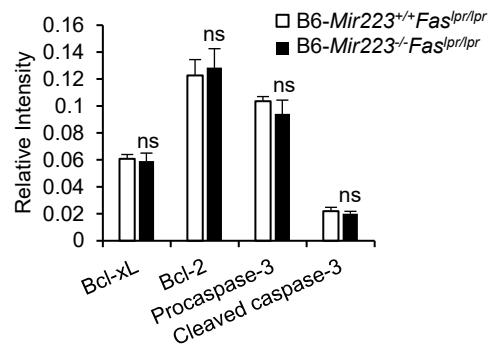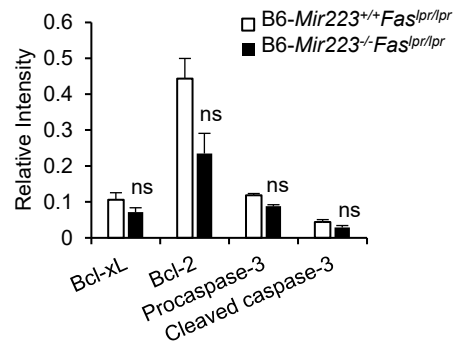

# Supplementary Figure 5

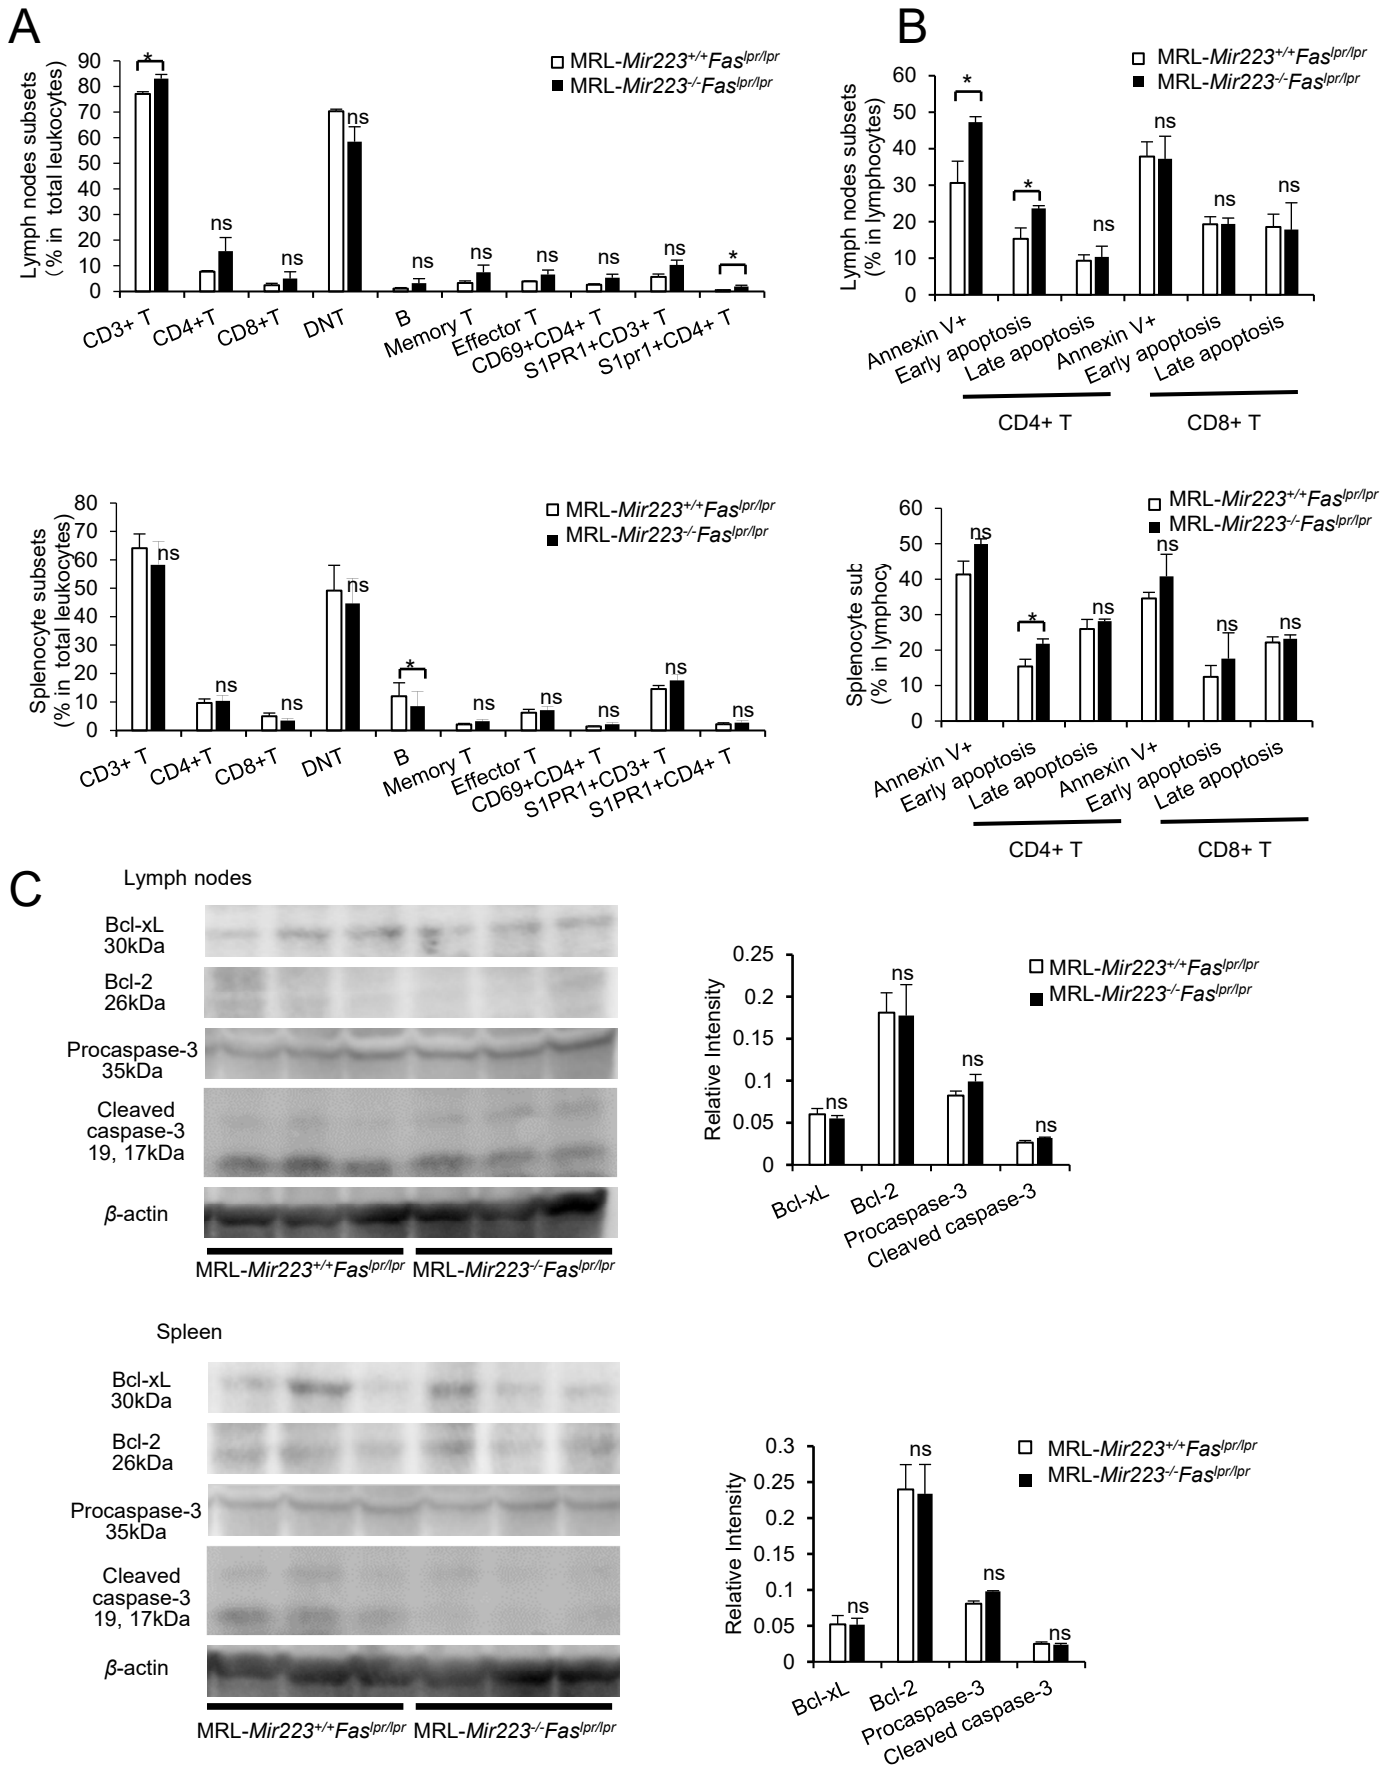

# Supplementary Figure 6

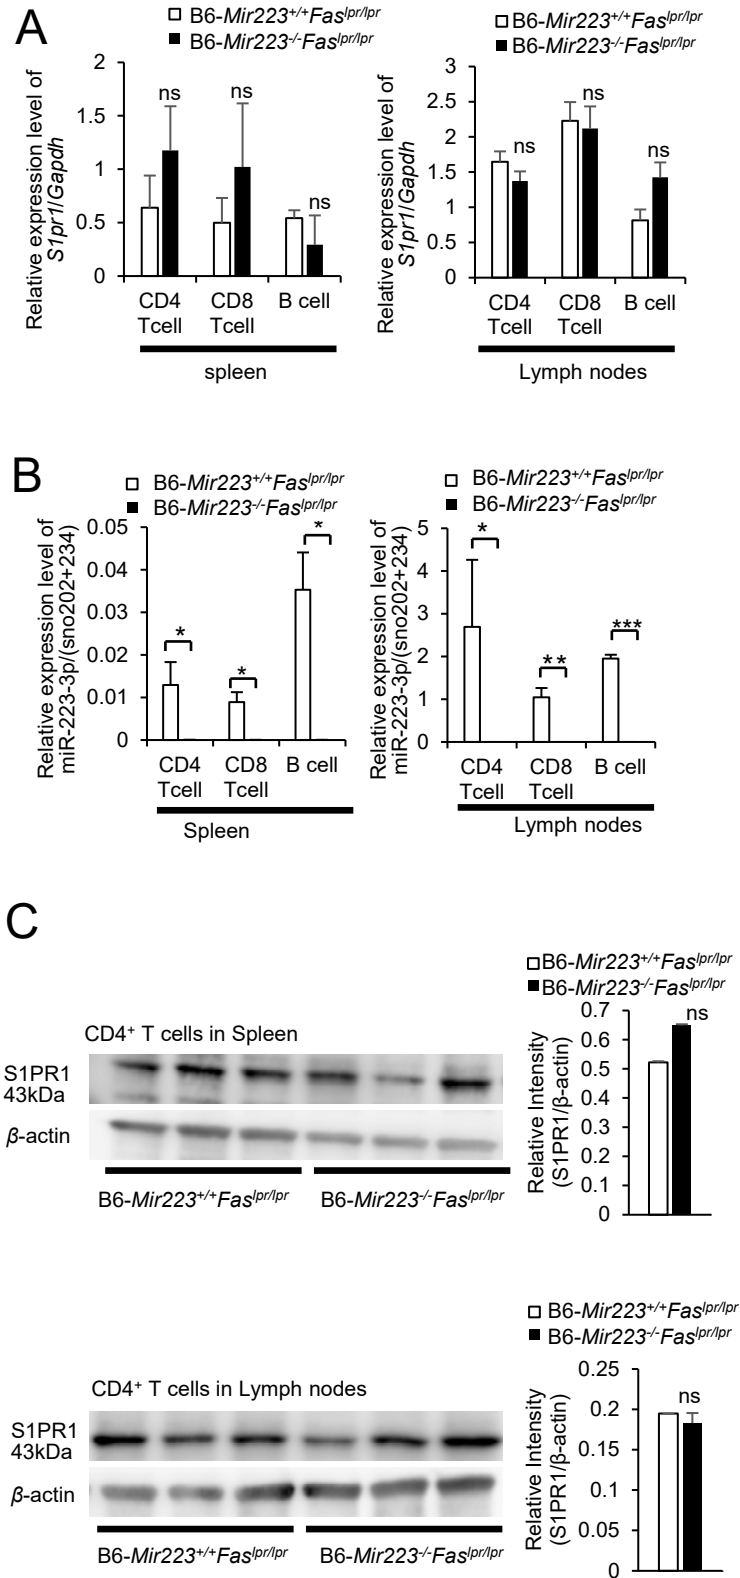

# Supplementary Figure 7

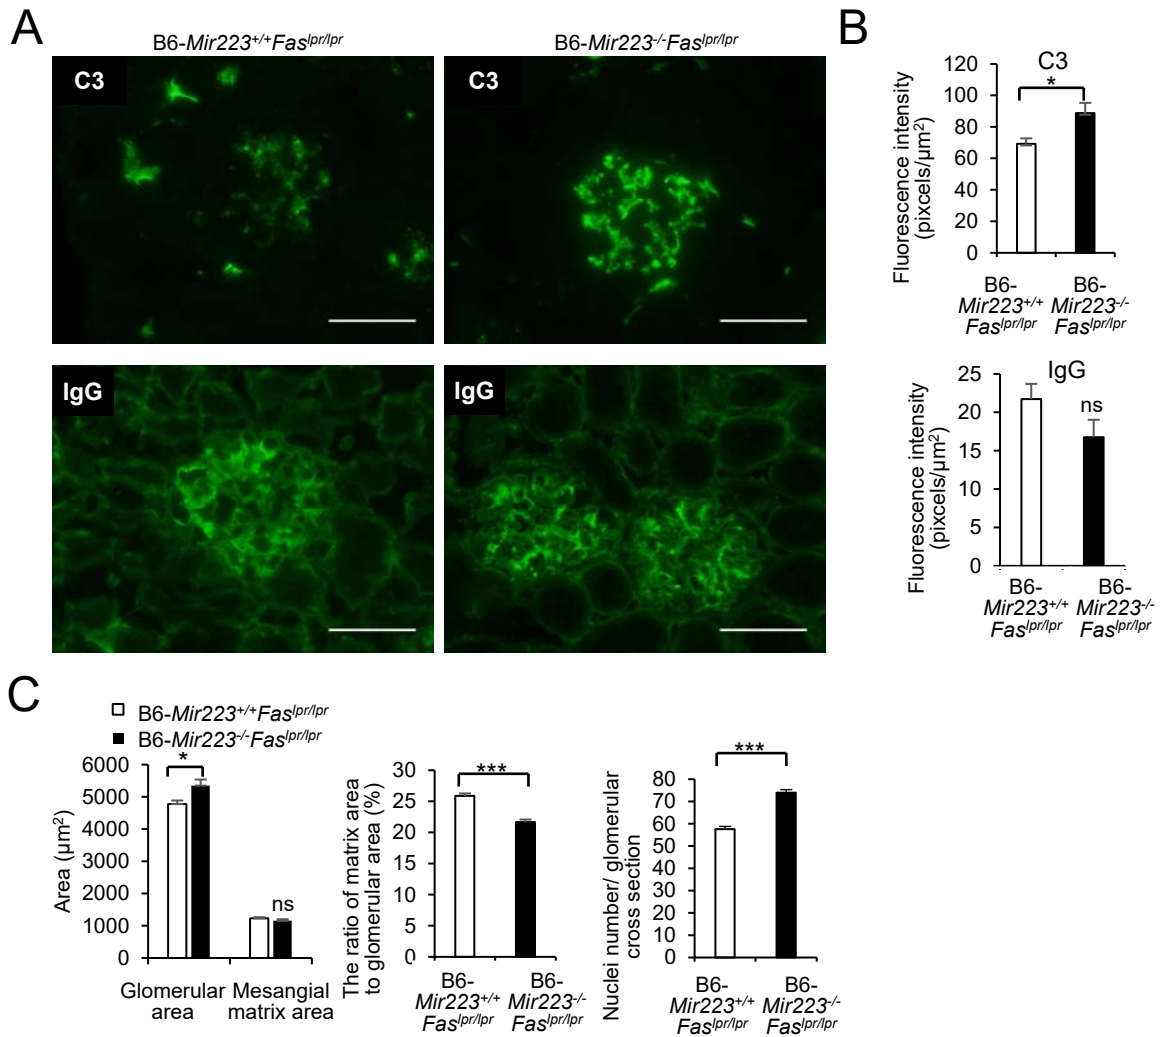

# Supplementary Figure 8

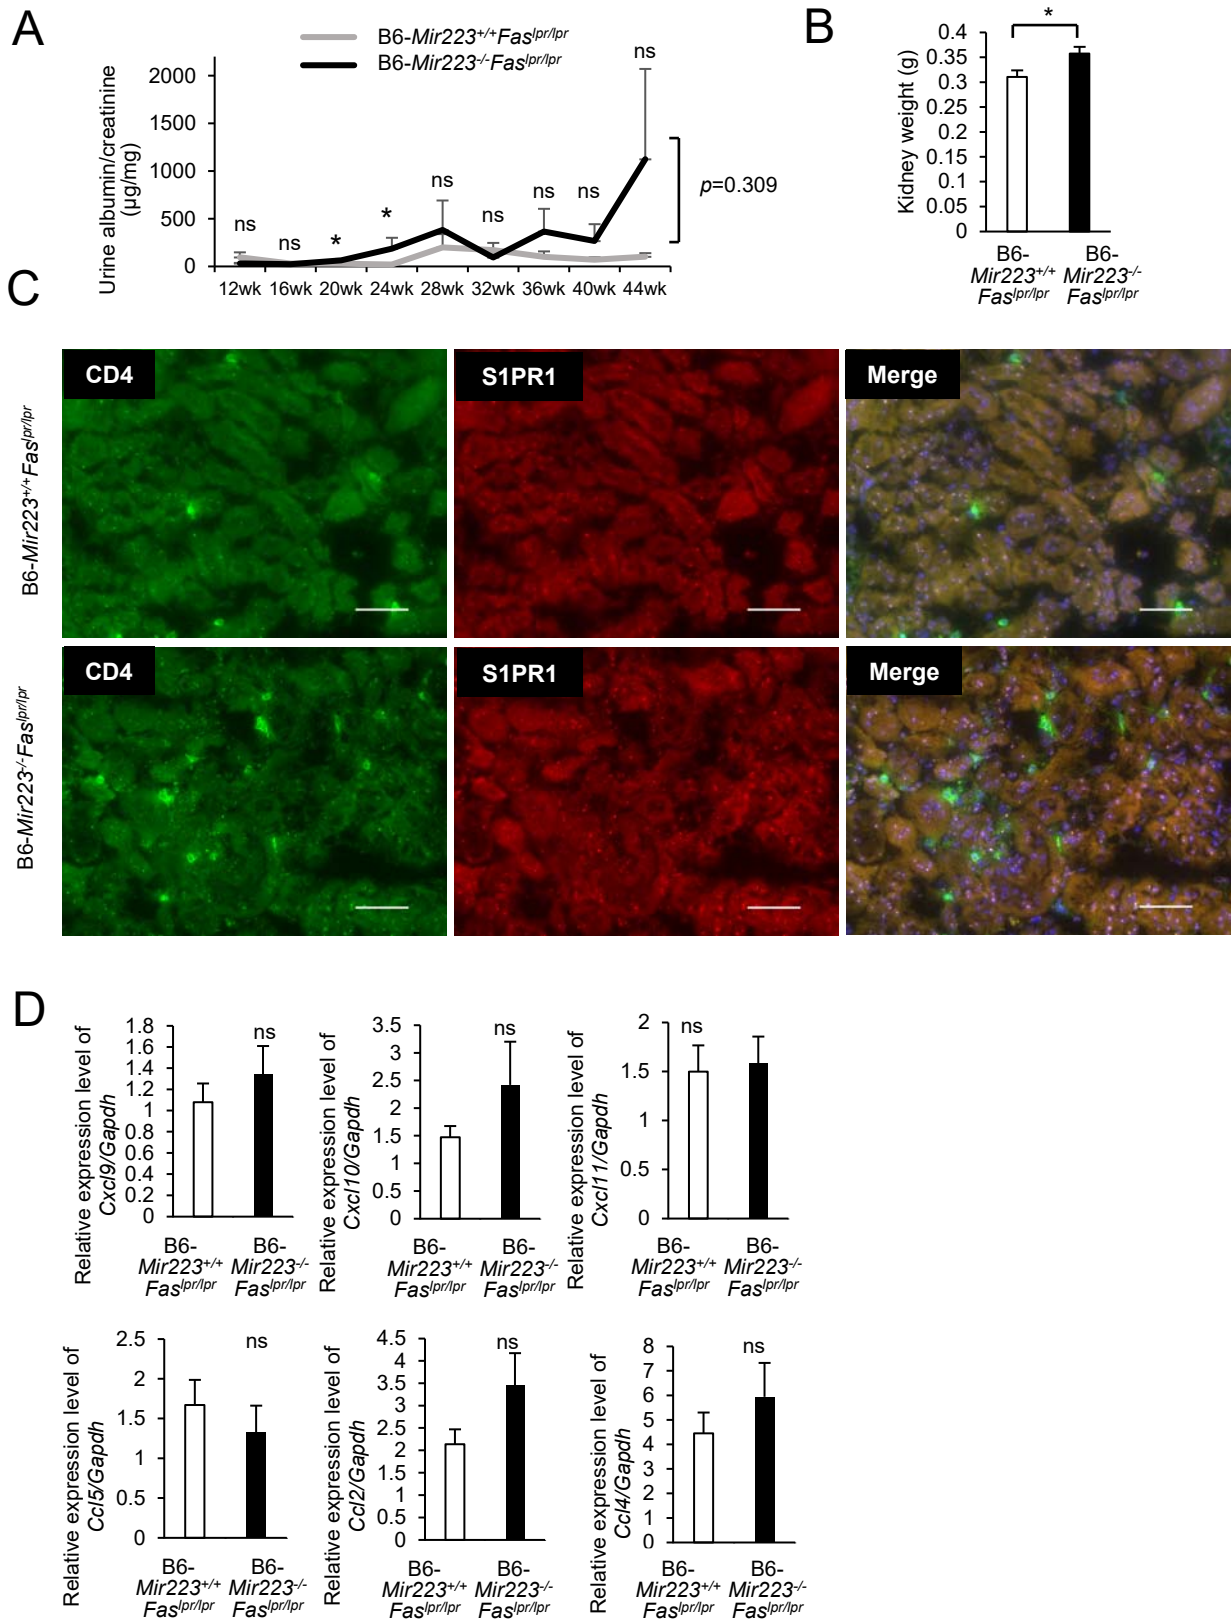



# Supplementary Figure 9

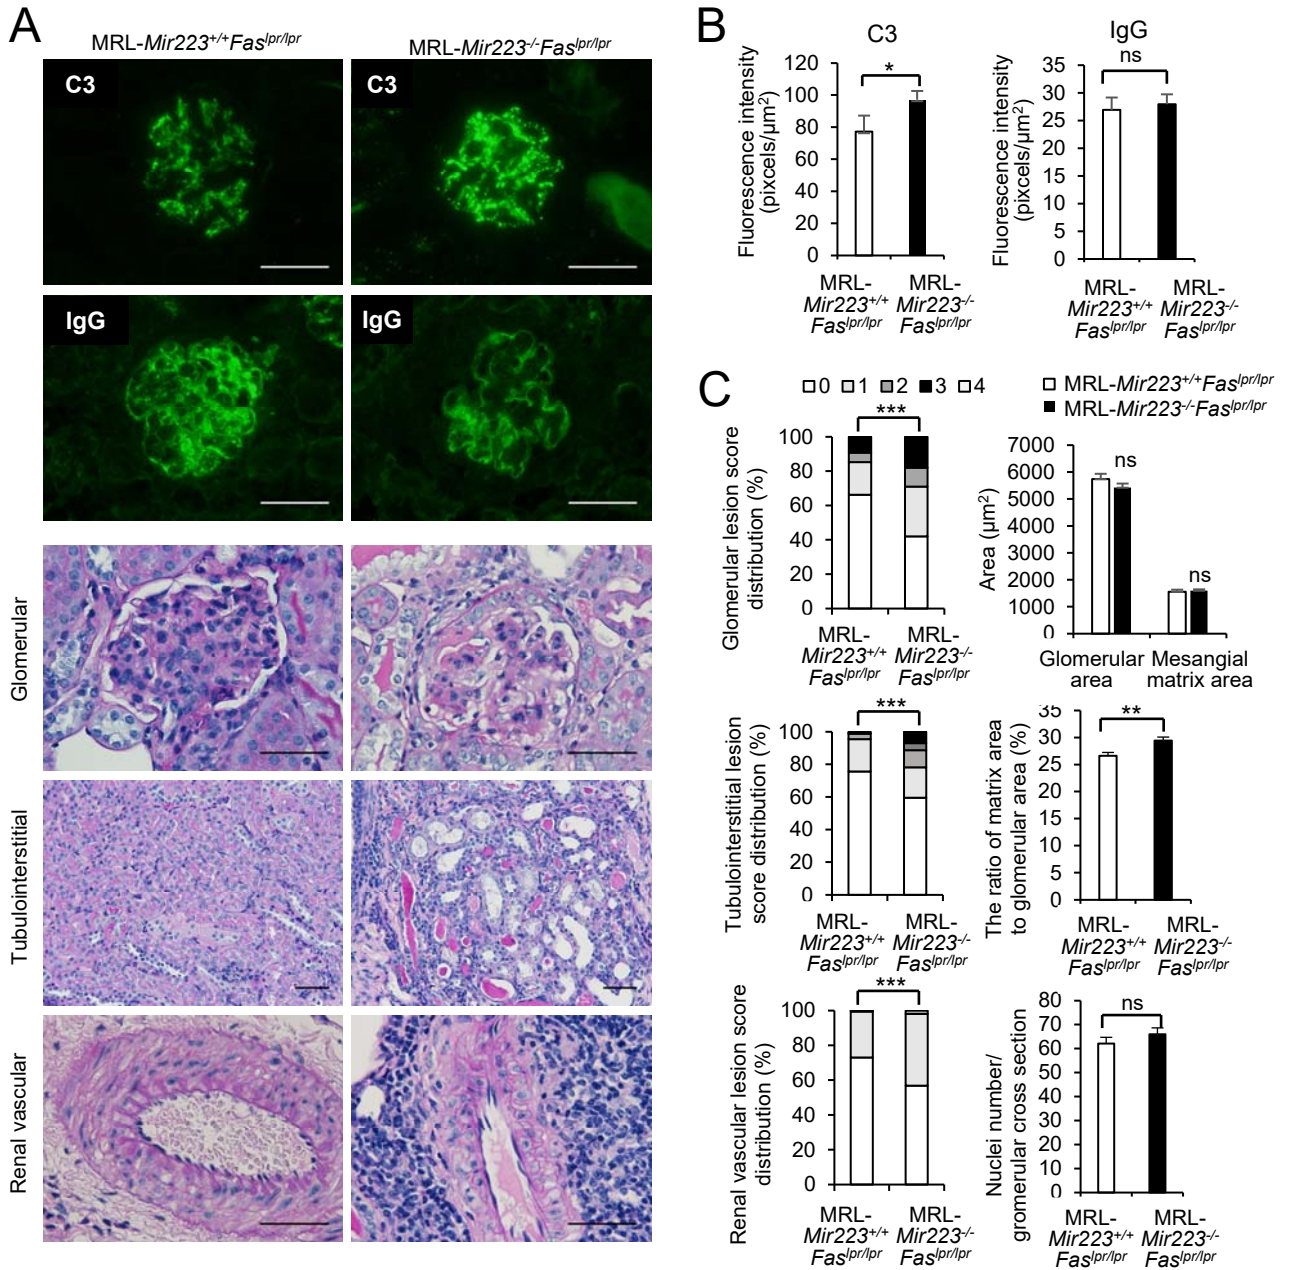

# Supplementary Figure 10

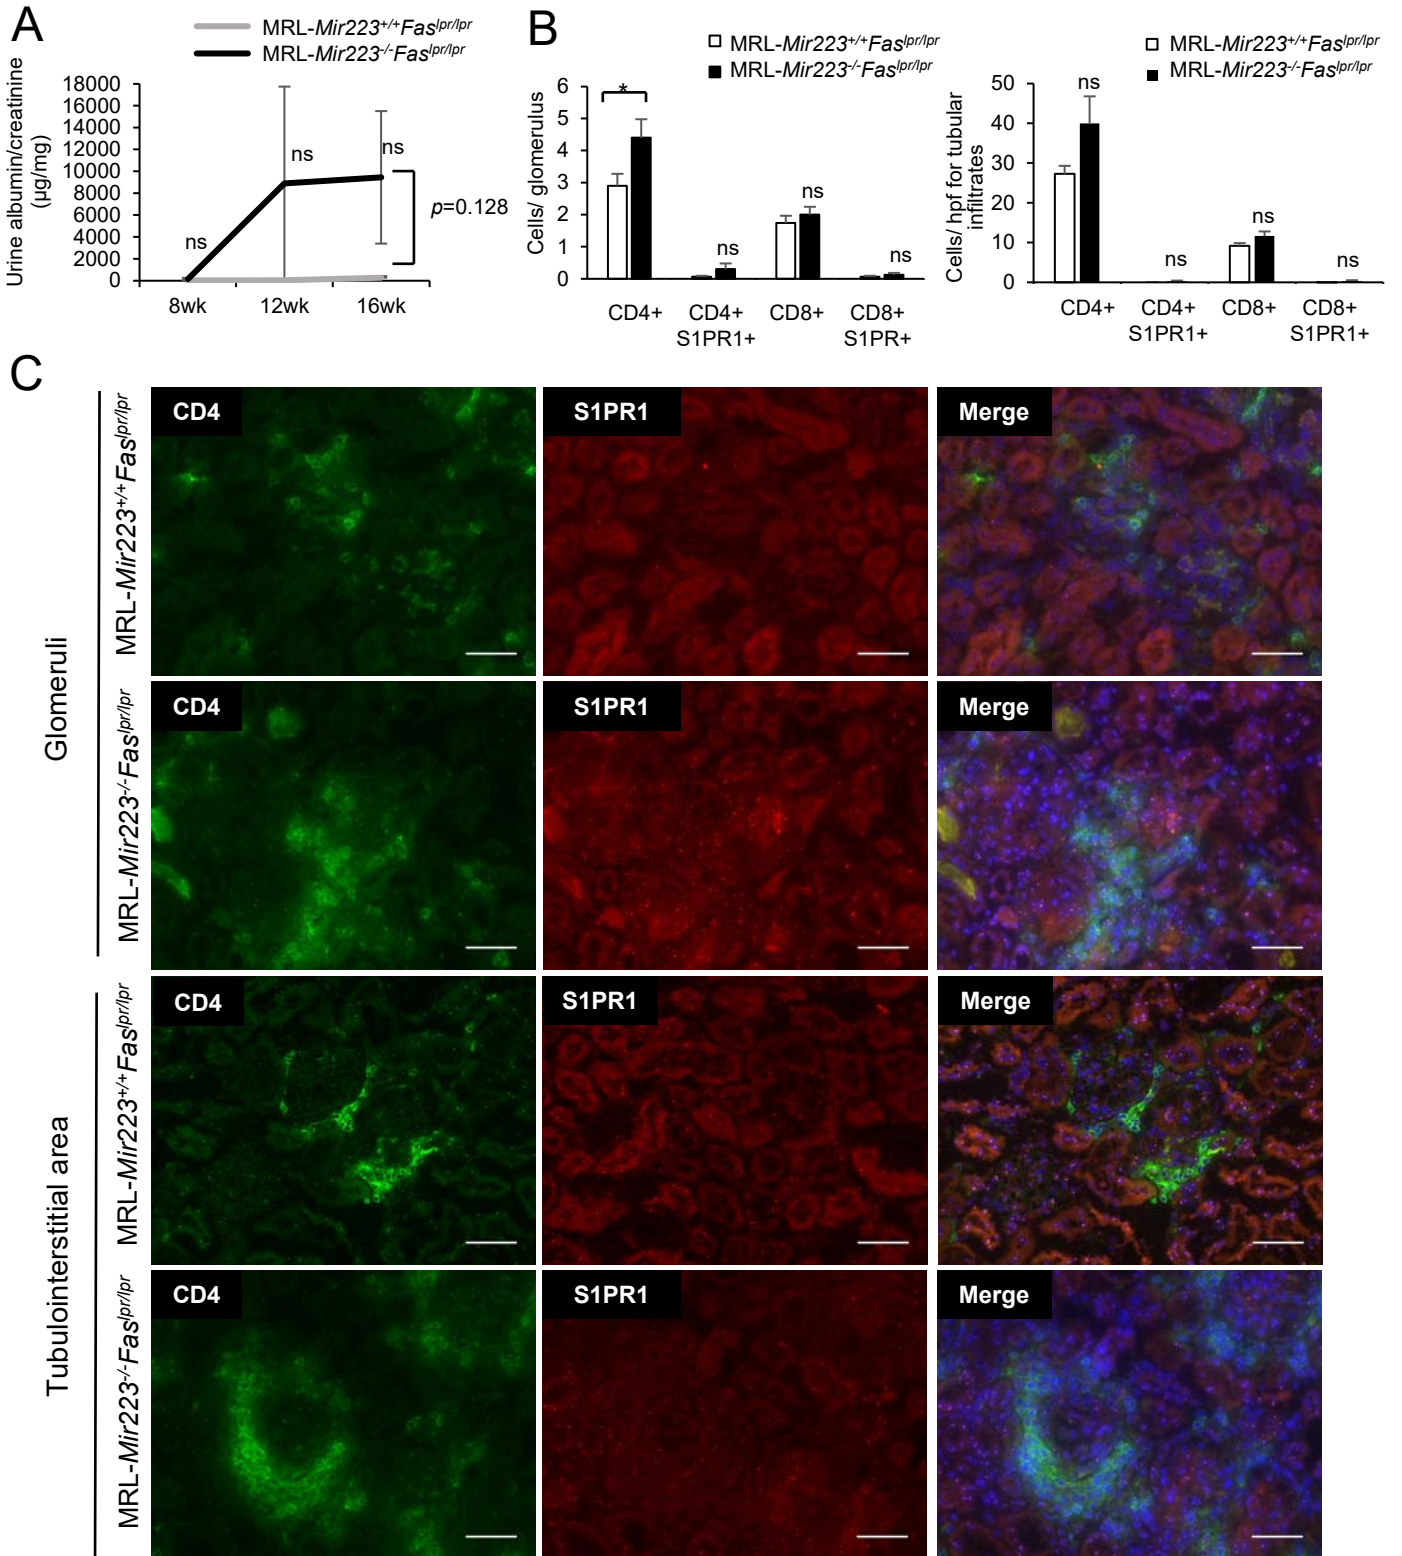

# Supplementary Figure 11

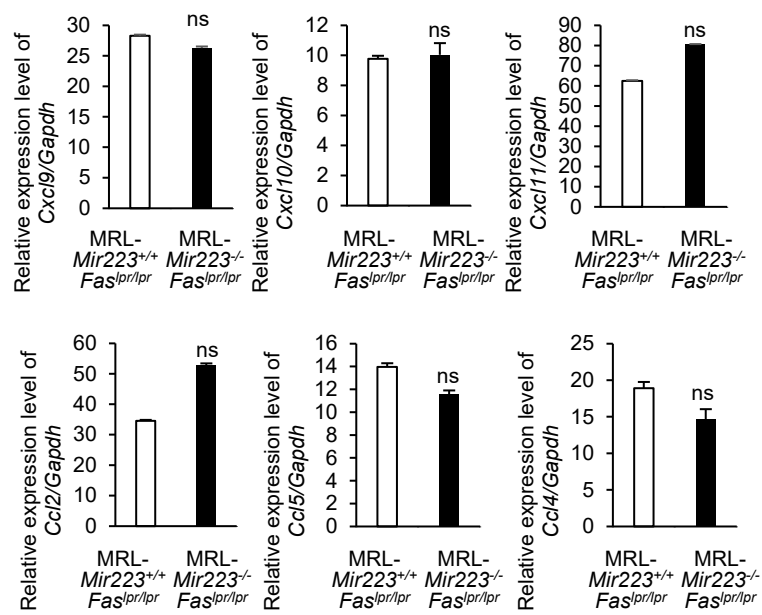

Supplement: Image_1.pdf [file Image_1.pdf]
